# Supplementary material for: A Geospatial Modelling Approach to Understand the Spatio-Temporal Impacts of Grazing on Soil Susceptibility to Erosion
Source: MDPI journal article supplement (doi:10.3390/soilsystems7020030), 2023-03-30
Supplement: s1 [file s1]

## Supplementary material

**Table S1:** Selection of best scenarios (defined by occupation period in days, and stock density, au/ha) of Lincoln University Mount Grand Station paddocks for each season and each stock type (sheep, deer, or cattle) to maximise grazing intensity and reduce soil loss (t/ha/year), according to outputs of the Donovan and Monaghan (2021 [14]) grazing and treading model.

| Paddock | ST     | Summer |    | Autumn |    | Winter |    | Spring |    |
|---------|--------|--------|----|--------|----|--------|----|--------|----|
|         |        | SD     | OP | SD     | OP | SD     | OP | SD     | OP |
| 6       | Sheep  | 18     | 30 | 18     | 20 | 27     | 20 | 18     | 30 |
|         | Deer   | 27     | 20 | 18     | 20 | 6      | 20 | 27     | 20 |
|         | Cattle | 18     | 20 | 18     | 20 | 3      | 20 | 12     | 30 |
| 7       | Sheep  | 12     | 50 | 27     | 20 | 27     | 30 | 12     | 50 |
|         | Deer   | 27     | 30 | 27     | 20 | 6      | 20 | 27     | 30 |
|         | Cattle | 18     | 20 | 12     | 20 | 3      | 20 | 18     | 30 |
| 11      | Sheep  | 18     | 30 | 18     | 20 | 27     | 20 | 18     | 30 |
|         | Deer   | 27     | 20 | 18     | 20 | 6      | 20 | 27     | 20 |
|         | Cattle | 18     | 20 | 18     | 20 | 3      | 20 | 12     | 30 |
| 12      | Sheep  | 27     | 20 | 27     | 15 | 18     | 20 | 27     | 20 |
|         | Deer   | 18     | 20 | 12     | 20 | 6      | 20 | 18     | 20 |
|         | Cattle | 27     | 15 | 6      | 30 | 3      | 20 | 27     | 15 |
| 13      | Sheep  | 18     | 30 | 18     | 20 | 27     | 20 | 18     | 30 |
|         | Deer   | 27     | 20 | 18     | 20 | 6      | 20 | 27     | 20 |
|         | Cattle | 18     | 20 | 18     | 20 | 3      | 20 | 12     | 30 |
| 14      | Sheep  | 18     | 30 | 18     | 20 | 27     | 20 | 18     | 30 |
|         | Deer   | 27     | 20 | 18     | 20 | 6      | 20 | 27     | 20 |
|         | Cattle | 18     | 20 | 18     | 20 | 3      | 20 | 12     | 30 |
| 15      | Sheep  | 12     | 50 | 27     | 20 | 27     | 30 | 12     | 50 |
|         | Deer   | 27     | 30 | 27     | 20 | 6      | 20 | 27     | 30 |
|         | Cattle | 18     | 20 | 12     | 20 | 3      | 20 | 18     | 30 |
| 16      | Sheep  | 12     | 50 | 27     | 20 | 27     | 30 | 12     | 50 |
|         | Deer   | 27     | 30 | 27     | 20 | 6      | 20 | 27     | 30 |
|         | Cattle | 18     | 20 | 12     | 20 | 3      | 20 | 18     | 30 |
| 19      | Sheep  | 27     | 20 | 27     | 15 | 18     | 20 | 27     | 20 |
|         | Deer   | 18     | 20 | 12     | 20 | 6      | 20 | 18     | 20 |
|         | Cattle | 27     | 15 | 6      | 30 | 3      | 20 | 27     | 15 |
| 25      | Sheep  | 18     | 30 | 18     | 20 | 27     | 20 | 18     | 30 |
|         | Deer   | 27     | 20 | 18     | 20 | 6      | 20 | 27     | 20 |
|         | Cattle | 18     | 20 | 18     | 20 | 3      | 20 | 12     | 30 |
| 27      | Sheep  | 18     | 30 | 18     | 20 | 27     | 20 | 18     | 30 |
|         | Deer   | 27     | 20 | 18     | 20 | 6      | 20 | 27     | 20 |
|         | Cattle | 18     | 20 | 18     | 20 | 3      | 20 | 12     | 30 |
| 29      | Sheep  | 12     | 30 | 12     | 30 | 27     | 30 | 18     | 30 |
|         | Deer   | 18     | 20 | 18     | 20 | 12     | 15 | 27     | 20 |
|         | Cattle | 12     | 20 | 12     | 20 | 3      | 20 | 18     | 20 |
| 30      | Sheep  | 12     | 30 | 12     | 30 | 27     | 30 | 18     | 30 |
|         | Deer   | 18     | 20 | 18     | 20 | 12     | 15 | 27     | 20 |
|         | Cattle | 12     | 20 | 12     | 20 | 3      | 20 | 18     | 20 |
| 36      | Sheep  | 27     | 15 | 18     | 15 | 18     | 15 | 27     | 15 |
|         | Deer   | 18     | 20 | 12     | 15 | 6      | 20 | 18     | 20 |
|         | Cattle | 12     | 20 | 12     | 15 | 3      | 20 | 12     | 20 |

|    |        |    |    |    |    |    |    |    |    |
|----|--------|----|----|----|----|----|----|----|----|
| 40 | Sheep  | 12 | 50 | 27 | 20 | 27 | 30 | 12 | 50 |
|    | Deer   | 27 | 30 | 27 | 20 | 6  | 20 | 27 | 30 |
|    | Cattle | 18 | 20 | 12 | 20 | 3  | 20 | 18 | 30 |
| 43 | Sheep  | 27 | 20 | 27 | 15 | 18 | 20 | 27 | 20 |
|    | Deer   | 18 | 20 | 12 | 20 | 6  | 20 | 18 | 20 |
|    | Cattle | 27 | 15 | 6  | 30 | 3  | 20 | 27 | 15 |
| 59 | Sheep  | 27 | 15 | 18 | 15 | 18 | 15 | 27 | 15 |
|    | Deer   | 18 | 20 | 12 | 15 | 6  | 20 | 18 | 20 |
|    | Cattle | 12 | 20 | 12 | 15 | 3  | 20 | 12 | 20 |
| 60 | Sheep  | 27 | 15 | 18 | 15 | 18 | 15 | 27 | 15 |
|    | Deer   | 18 | 20 | 12 | 15 | 6  | 20 | 18 | 20 |
|    | Cattle | 12 | 20 | 12 | 15 | 3  | 20 | 12 | 20 |
